# Supplementary material for: Detection of Bacteria-Induced Early-Stage Dental Caries Using Three-Dimensional Mid-Infrared Thermophotonic Imaging
Source: MDPI journal article supplement (doi:10.3390/bioengineering10010112), 2023-01-12
Supplement: s1 [file s1]

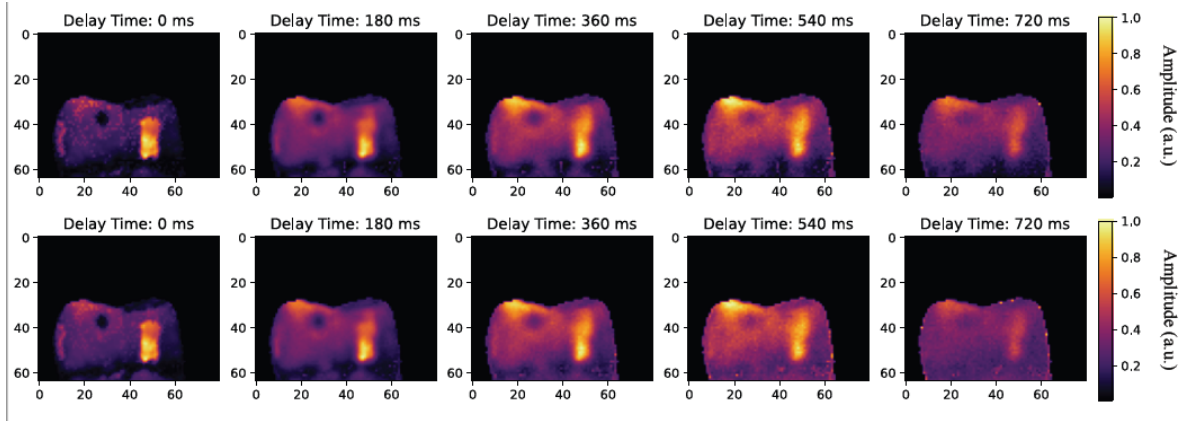

**Figure S1.** Select tomographic amplitude slices: **(Top Row)** eTC-PCT amplitude and **(Bottom Row)** TC-PCT amplitude of the B8 sample buccal surface after 8 days of bacterial-induced demineralization. Their corresponding amplitude values were normalized between 1.0 and 0 by subtracting the minimum amplitude value and then dividing by the maximum amplitude value within each slice. All slices were calculated using the same data from a 0.2-0.6 – Hz, 12-s chirp with 63-W peak laser power. Contrast of the slices has been enhanced using the slice-by-slice global histogram equalization algorithm described in software available online [13].

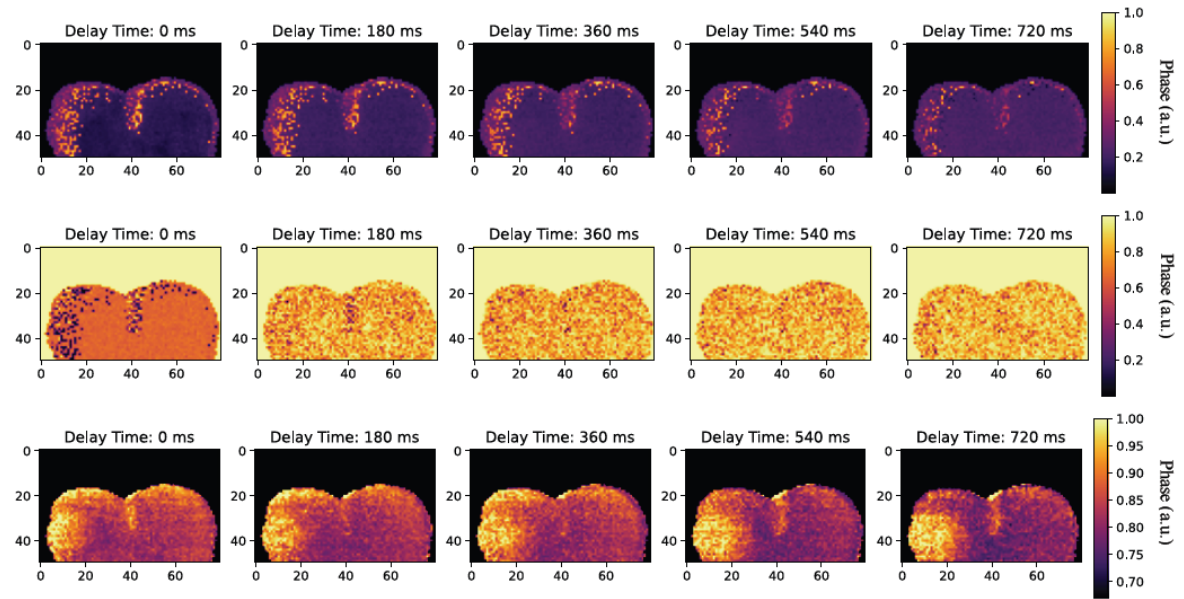

**Figure S2.** Select tomographic phase slices: **(Top Row)** eTC-PCT phase and **(Middle Row)** TC-PCT phase and **(Bottom Row)** TC-PCT LIOP of the M8 sample surface after 8 days of bacterial-induced demineralization. The caries lesion is not visible in any of the phase images. Their corresponding phase values were normalized between 1.0 and 0 by subtracting the minimum phase value and then dividing by the maximum phase value within each slice. All slices were calculated using the same data from a 0.2-0.6 – Hz, 12-s chirp with 63-W peak laser power. Contrast of the slices has been enhanced using the slice-by-slice global histogram equalization algorithm described in software available online [13]
